# Supplementary material for: Fluorescent Thienothiophene-Containing Squaraine Dyes and Threaded Supramolecular Complexes with Tunable Wavelengths between 600–800 nm
Source: PubMed Central journal article supplement (PMC6225225; doi:10.3390/molecules23092229), 2018-09-01
Supplement: molecules-23-02229-s001.pdf [file molecules-23-02229-s001.pdf]

*Supporting Information for*  
**Fluorescent Thienothiophene-Containing Squaraine Dyes and Threaded Supramolecular Complexes  
with Tunable Wavelengths between 600-800 nm**

Wenqi Liu, Hannah H. McGarraugh, and Bradley D. Smith\*

Department of Chemistry and Biochemistry,  
236 Nieuwland Science Hall,  
University of Notre Dame, Notre Dame, IN 46556, USA

[\\*smith.115@nd.edu](mailto:smith.115@nd.edu)

- A. Compound Characterization**
- B. Titration Data**
- C. Photophysical Data**
- D. Chemical Stability Data**
- E. Fluorescence Quantum Yields**

### A. Compound Characterization

The peaks assignments below are based on precedent and logic. They have not been confirmed by correlation methods.

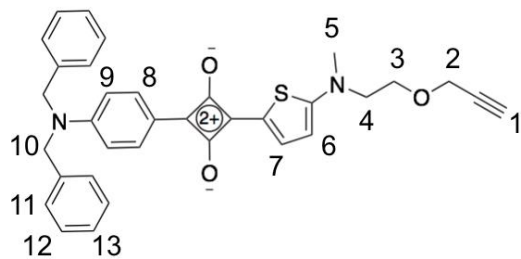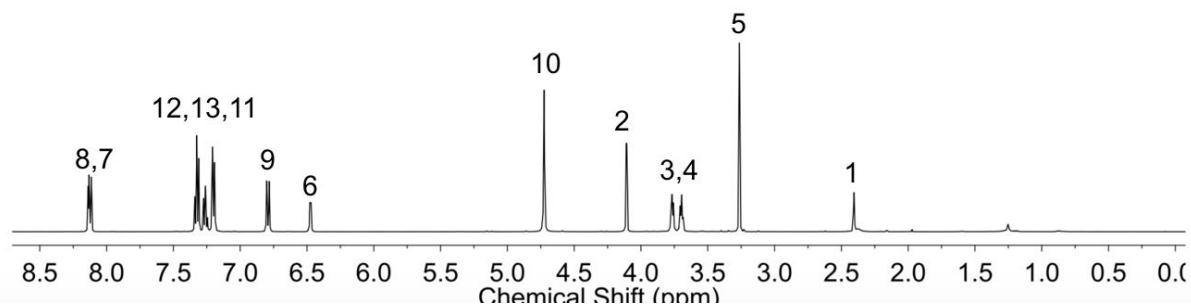

<sup>1</sup>H NMR (500 MHz, CDCl<sub>3</sub>) of **S1**.

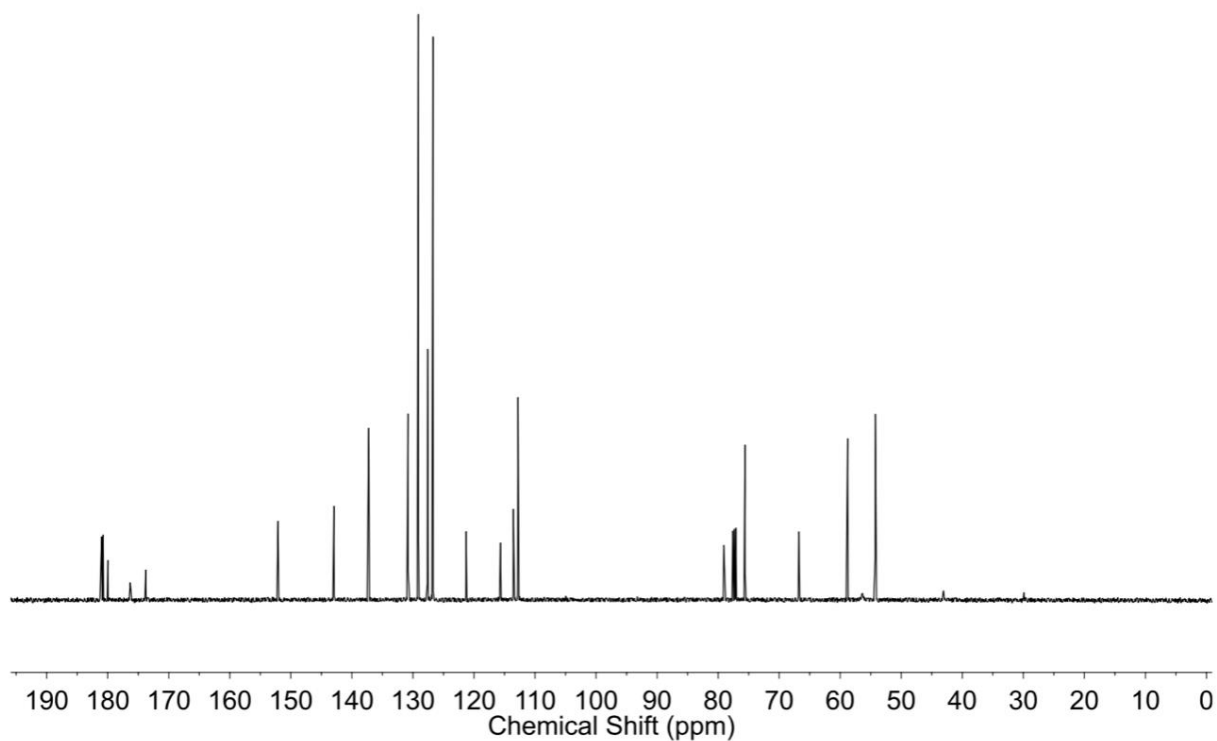

<sup>13</sup>C NMR (126 MHz, CDCl<sub>3</sub>) of **S1**.

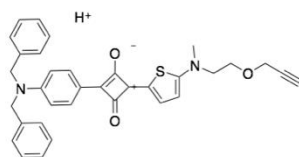

Chemical Formula:  $C_{33}H_{31}N_2O_3S^+$   
 Exact Mass: 547.2050  
 Molecular Weight: 547.6925  
 m/z: 547.2050 (100.0%), 548.2083 (36.8%), 549.2008 (4.5%),  
 549.2117 (3.9%), 549.2117 (2.7%), 550.2041 (1.7%)  
 Elemental Analysis: C, 74.56; H, 5.71; N, 5.11; O, 8.76; S, 5.85

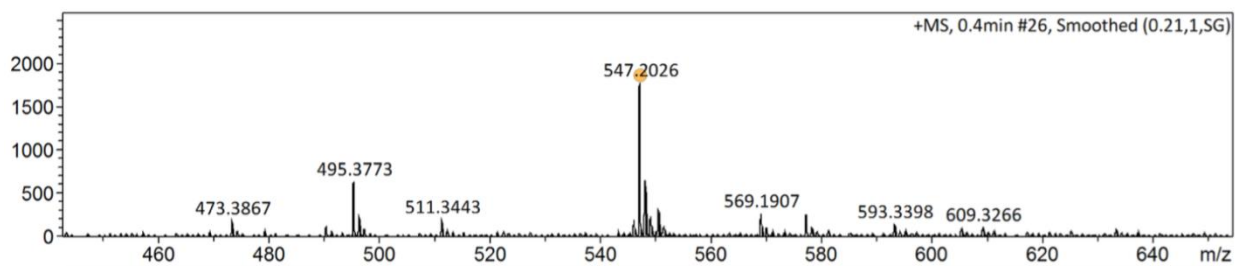

HRMS-ESI of **S1**.

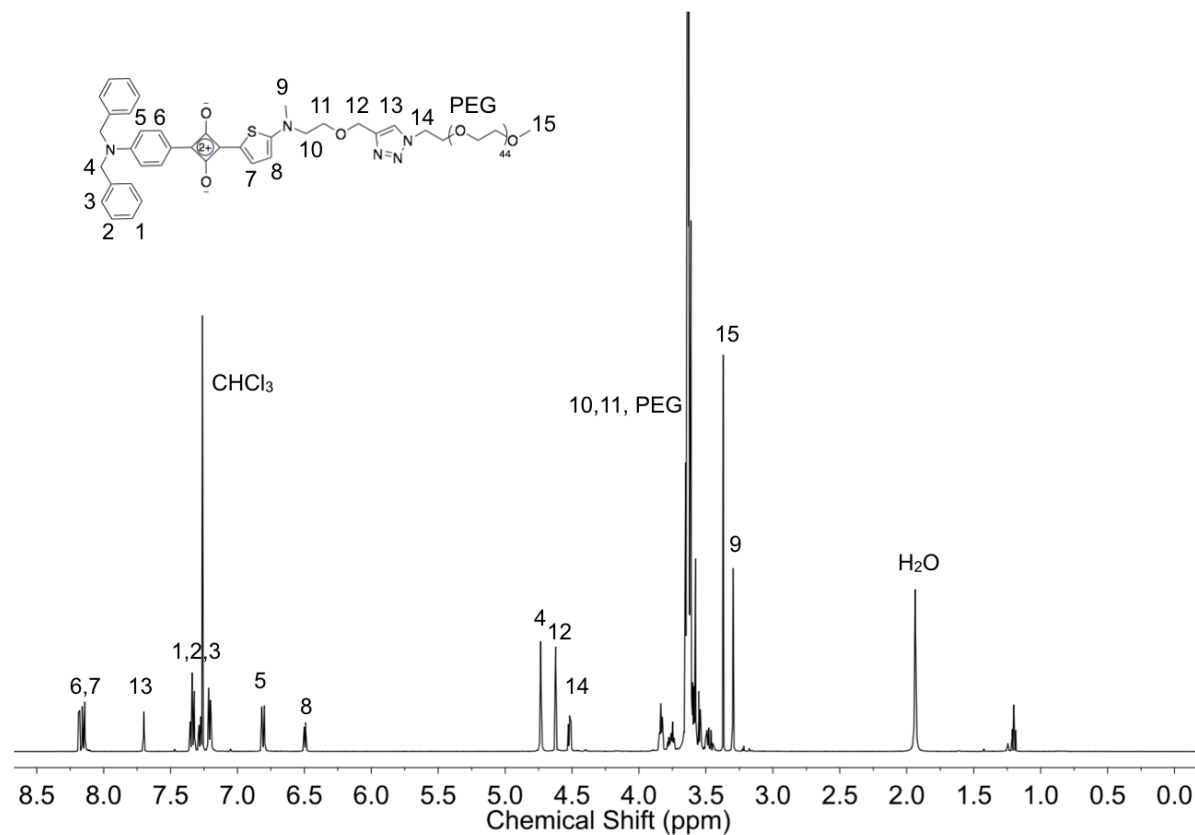

$^1H$  NMR (500 MHz,  $CDCl_3$ ) of **S1PEG**.

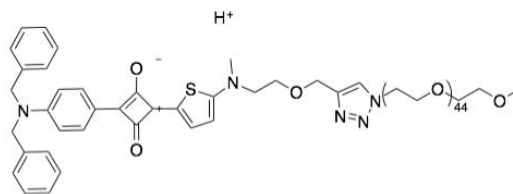

Chemical Formula: C<sub>125</sub>H<sub>213</sub>N<sub>5</sub>O<sub>46</sub>S

Exact Mass: 2584.4101

Molecular Weight: 2586.1260

m/z: 2585.4134 (100.0%), 2584.4101 (74.0%), 2586.4168 (35.4%), 2586.4168 (31.6%), 2587.4201 (22.9%), 2587.4177 (9.9%), 2588.4235 (8.9%), 2586.4143 (7.3%), 2587.4201 (6.8%), 2587.4092 (4.5%), 2588.4210 (3.5%), 2586.4059 (3.3%), 2588.4210 (3.1%), 2589.4268 (2.5%), 2586.4197 (2.4%), 2589.4244 (2.3%), 2586.4105 (1.8%), 2586.4176 (1.8%), 2585.4164 (1.8%), 2588.4126 (1.6%), 2588.4126 (1.4%), 2585.4071 (1.4%), 2585.4143 (1.4%), 2587.4138 (1.2%), 2589.4159 (1.0%)  
 Elemental Analysis: C, 58.05; H, 8.30; N, 2.71; O, 29.70; S, 1.24

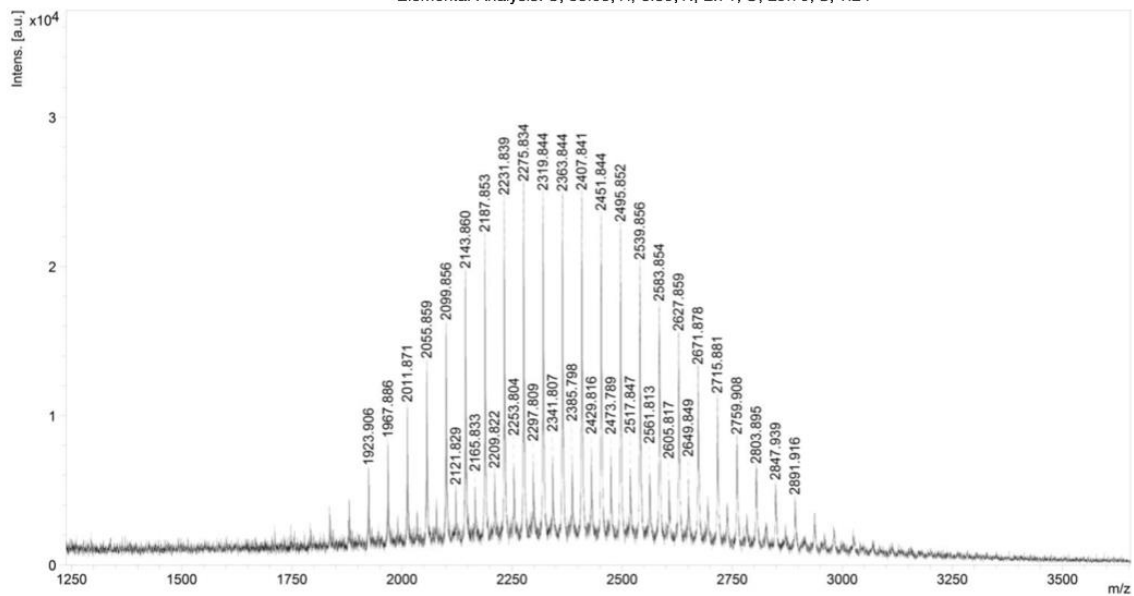

MS-MALDI (DHBA as matrix) of **S1PEG**. A set of peaks around 2363 reflect the polydispersity of the PEG<sub>45</sub> chains.

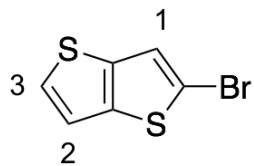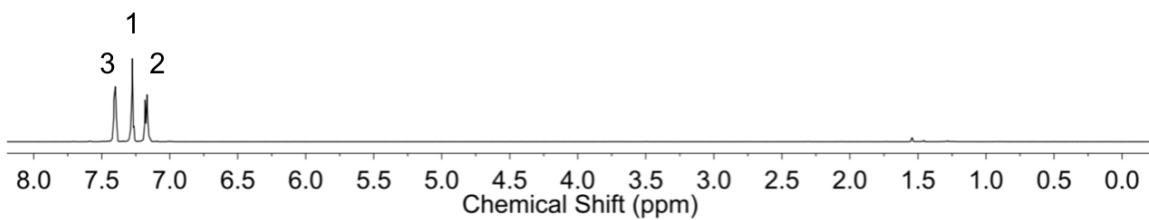

$^1\text{H}$  NMR (500 MHz,  $\text{CDCl}_3$ ) of **4**.

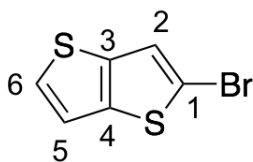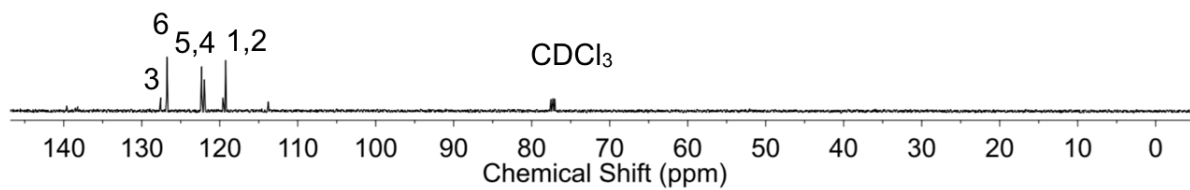

$^{13}\text{C}$  NMR (126 MHz,  $\text{CDCl}_3$ ) of **4**.

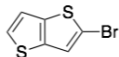

Chemical Formula:  $C_6H_3BrS_2$   
Exact Mass: 217.8860  
Molecular Weight: 219.1140  
m/z: 217.8860 (100.0%), 219.8839 (97.3%), 219.8818 (9.0%),  
221.8797 (8.8%), 218.8893 (6.5%), 220.8873 (6.3%), 218.8853  
(1.6%), 220.8833 (1.6%)  
Elemental Analysis: C, 32.89; H, 1.38; Br, 36.47; S, 29.26

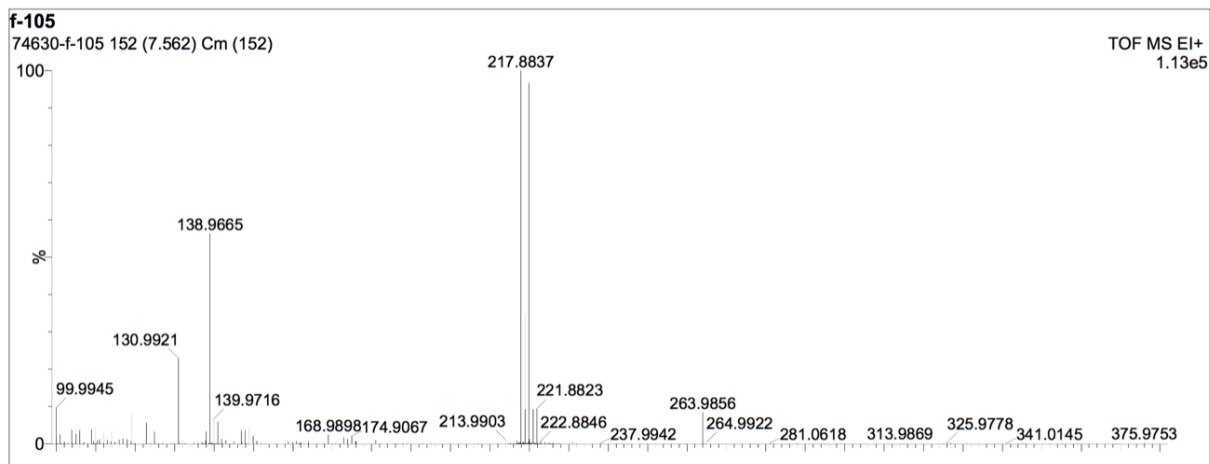

HRMS-ESI of **4**.

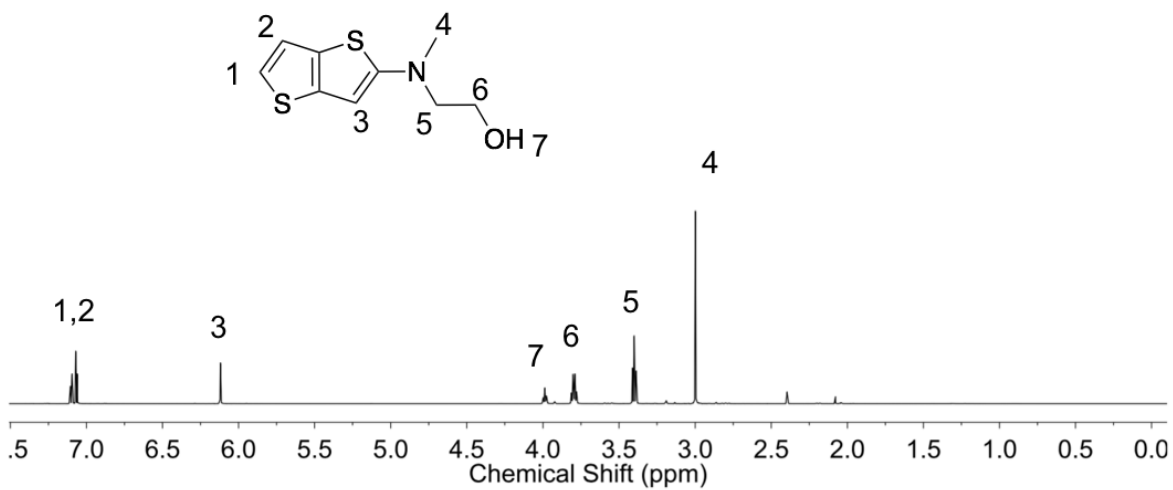

$^1H$  NMR (500 MHz, Acetone- $d_6$ ) of **5**.

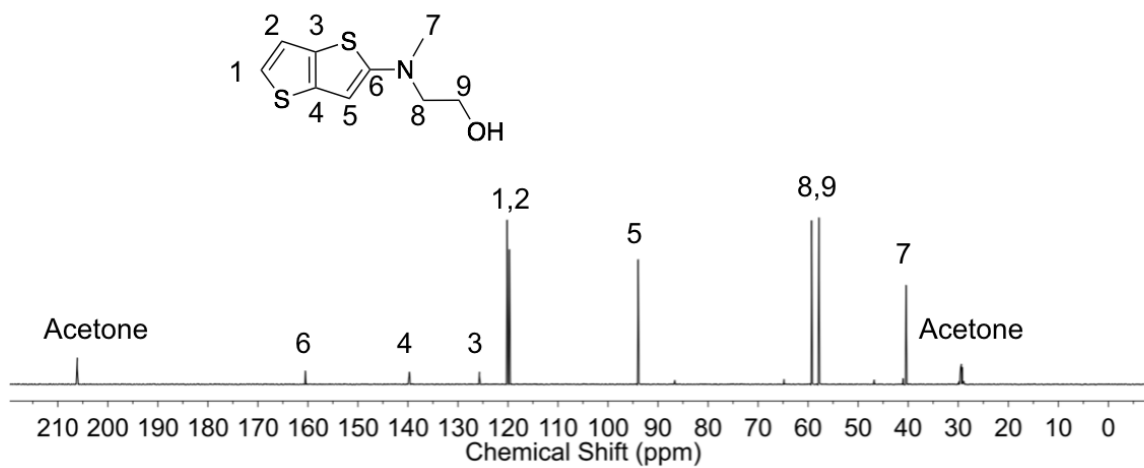

<sup>13</sup>C NMR (126 MHz, Acetone-d<sub>6</sub>) of **5**.

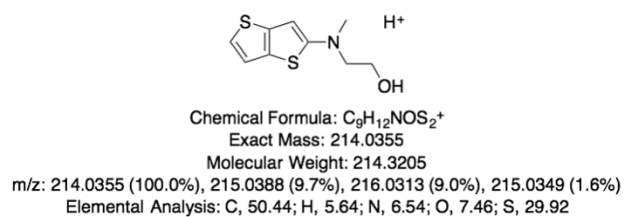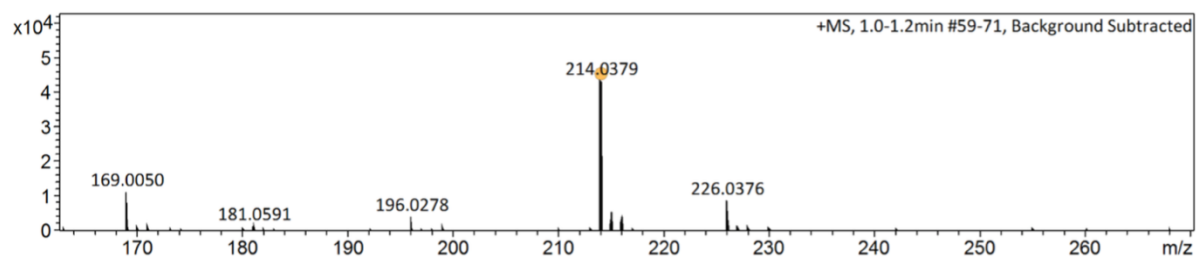

HRMS-ESI of **5**.

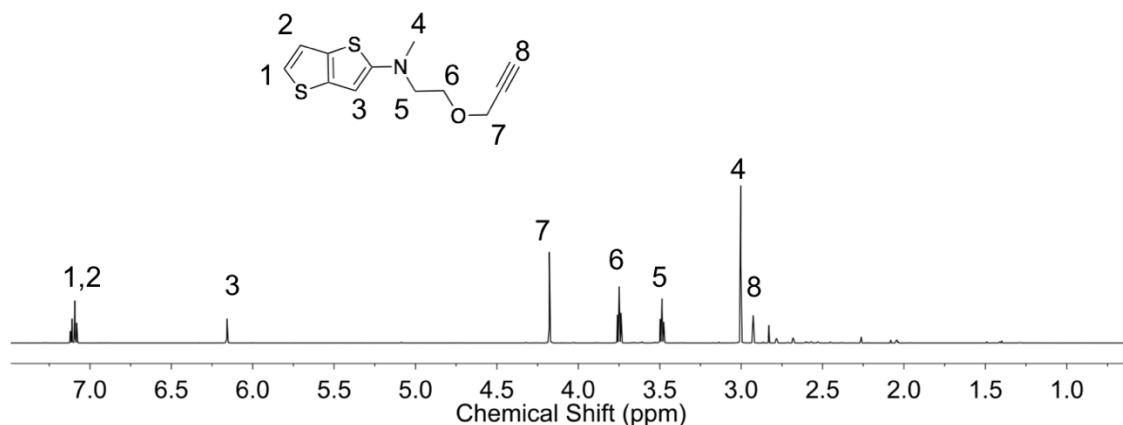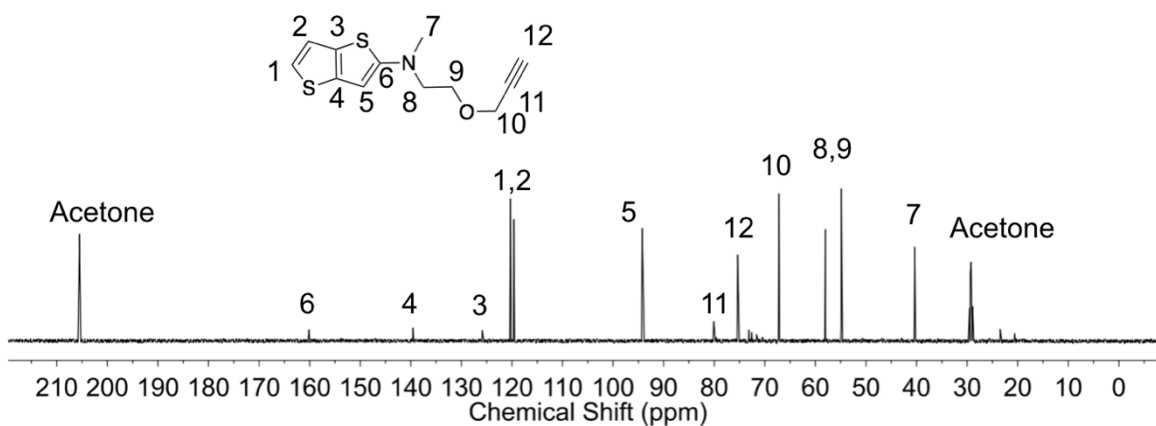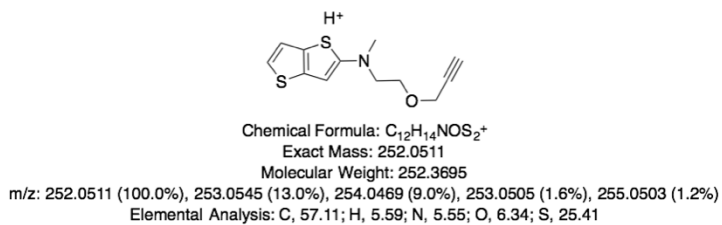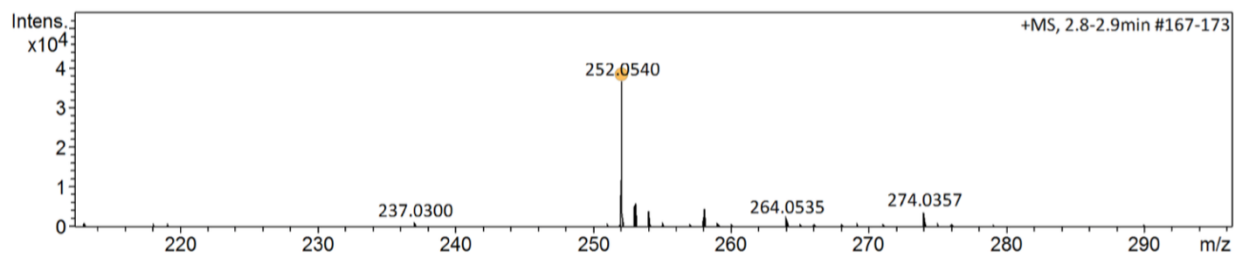



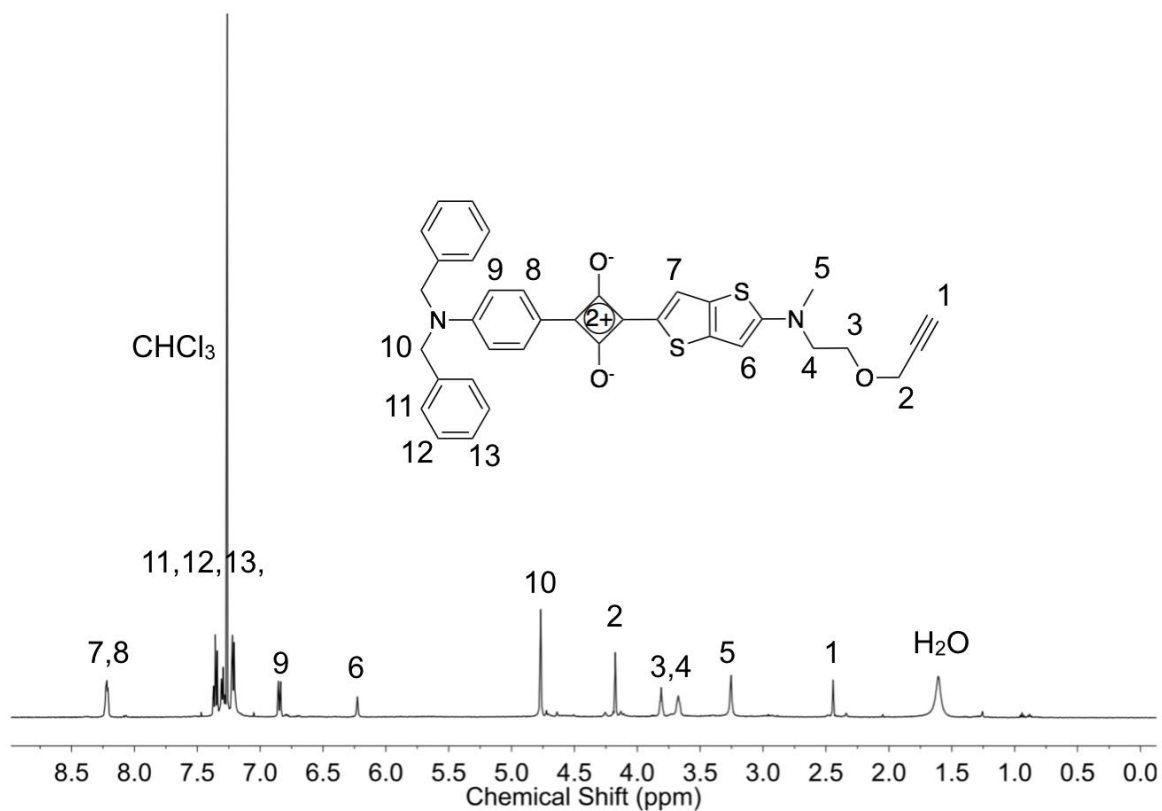

$^1\text{H}$  NMR (500 MHz,  $\text{CDCl}_3$ ) of **S2**.

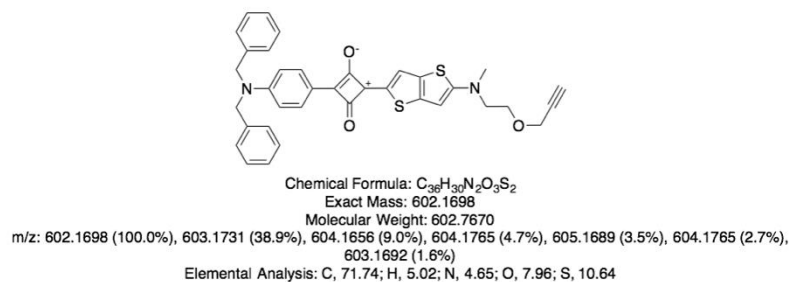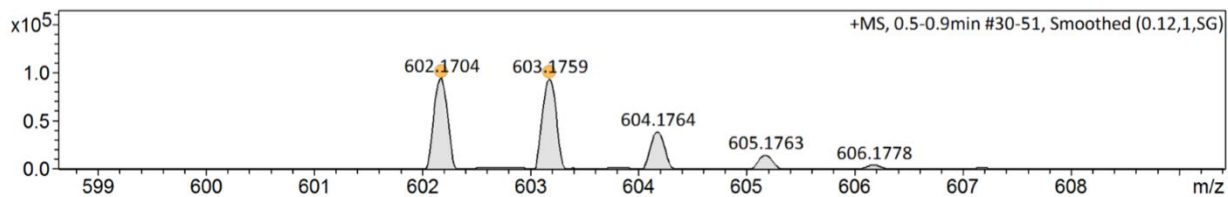

HRMS-ESI of **S2**.

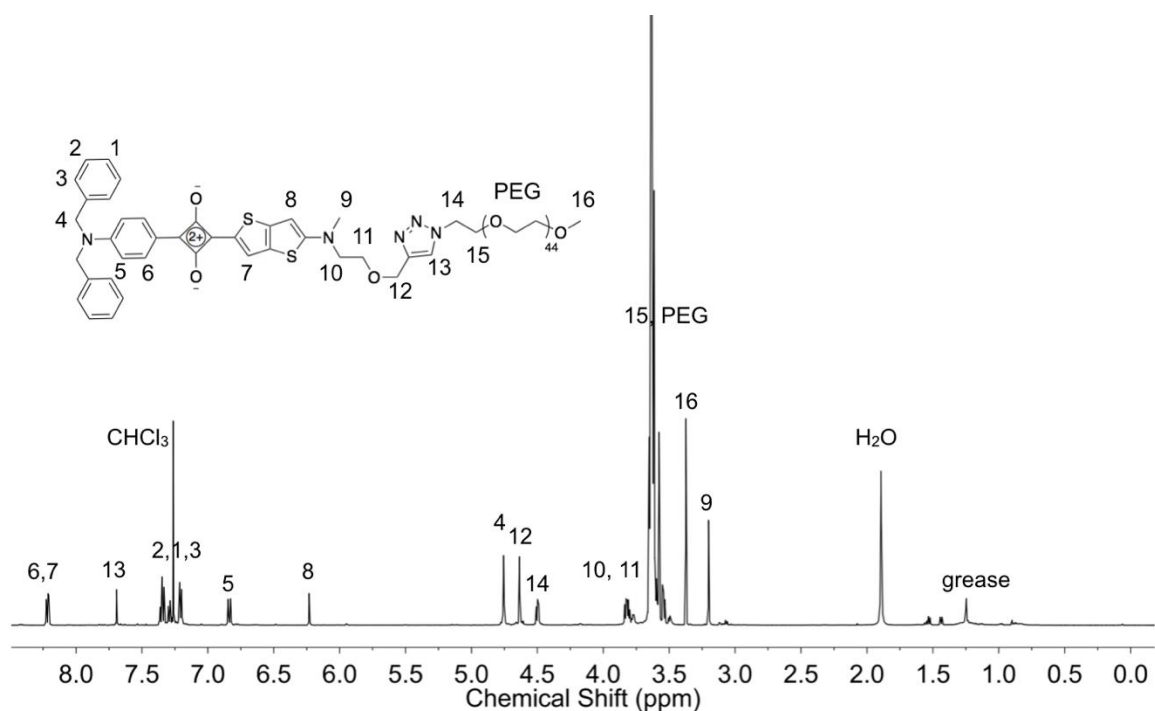

$^1\text{H}$  NMR (500 MHz,  $\text{CDCl}_3$ ) of **S2PEG**.

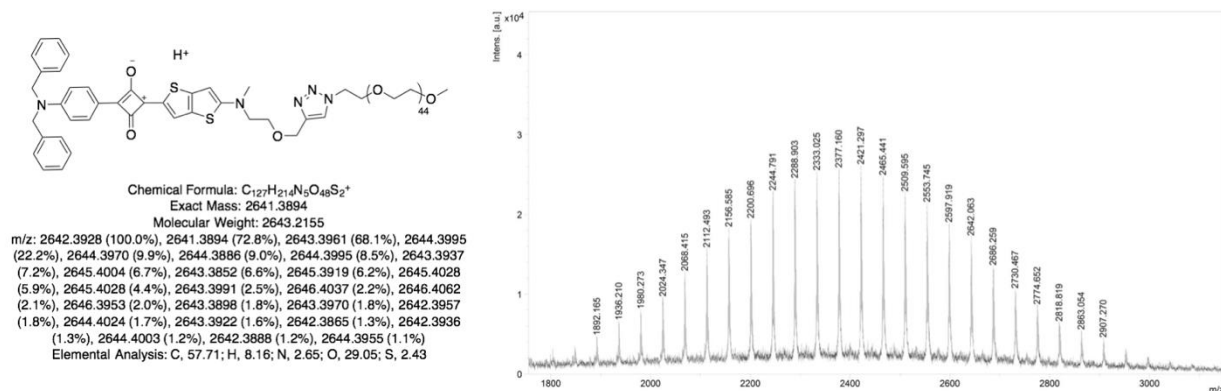

MS-MALDI (DHBA as matrix) of **S2PEG**. A set of peaks around 2421 reflect the polydispersity of the  $\text{PEG}_{45}$  chain.

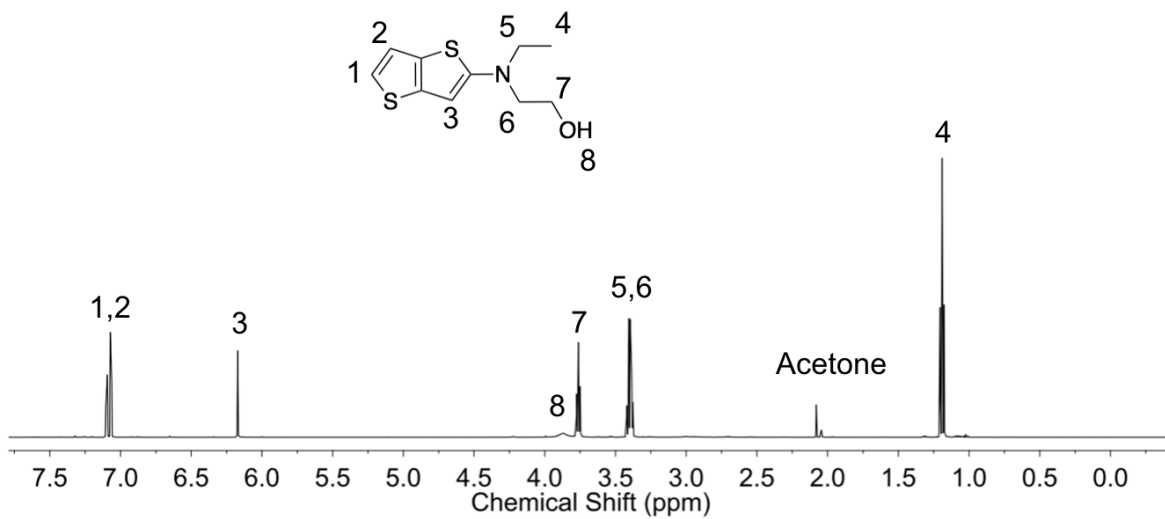

<sup>1</sup>H NMR (500 MHz, Acetone-d<sub>6</sub>) of 7.

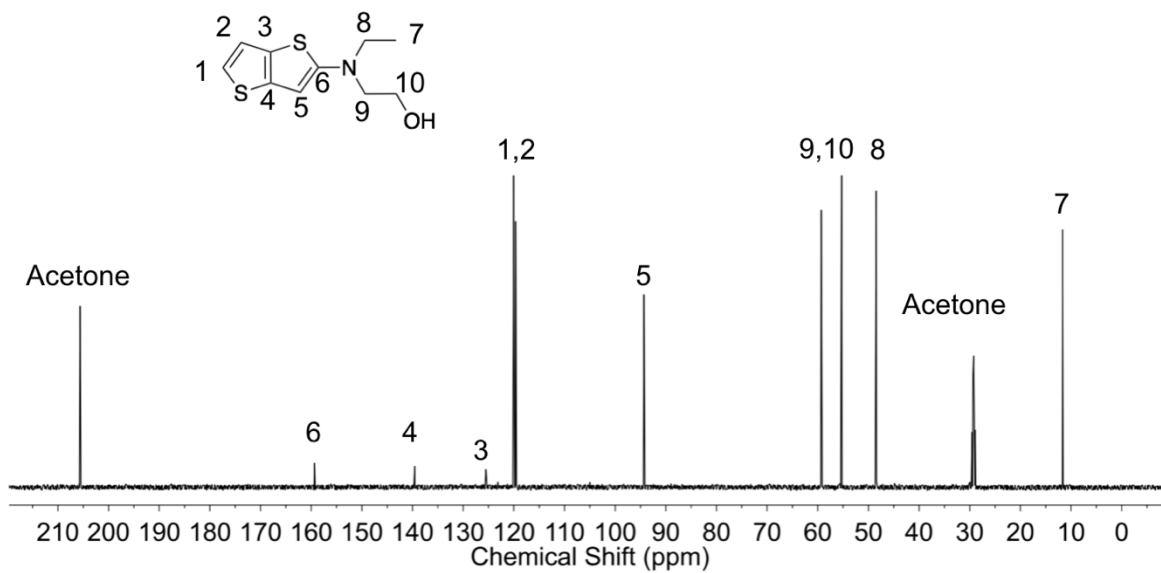

<sup>13</sup>C NMR (126 MHz, Acetone-d<sub>6</sub>) of 7.

H<sup>+</sup>

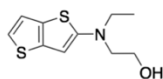

Chemical Formula: C<sub>10</sub>H<sub>14</sub>NOS<sub>2</sub><sup>+</sup>

Exact Mass: 228.0511

Molecular Weight: 228.3475

m/z: 228.0511 (100.0%), 229.0545 (10.8%), 230.0469 (9.0%), 229.0505 (1.6%)

Elemental Analysis: C, 52.60; H, 6.18; N, 6.13; O, 7.01; S, 28.08

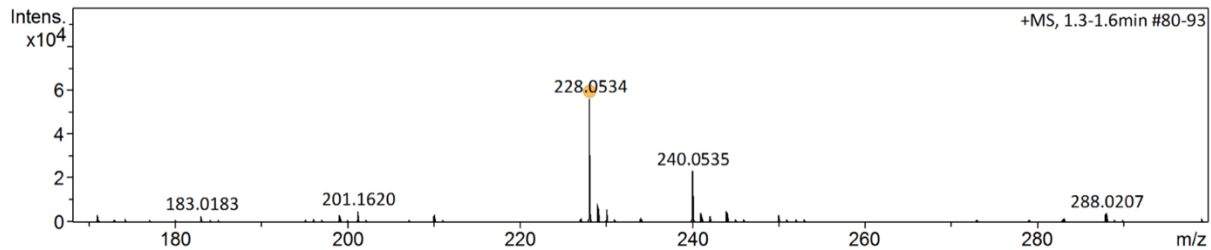

HRMS of 7.

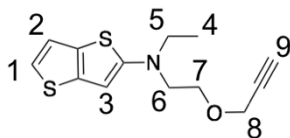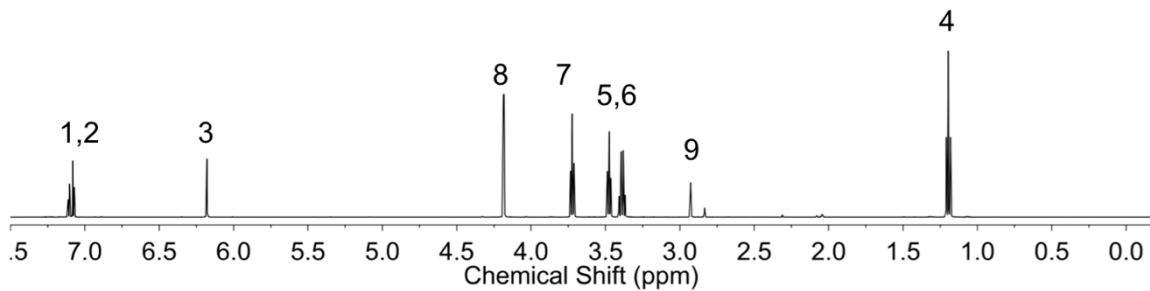

<sup>1</sup>H NMR (500 MHz, Acetone-d<sub>6</sub>) of 8.

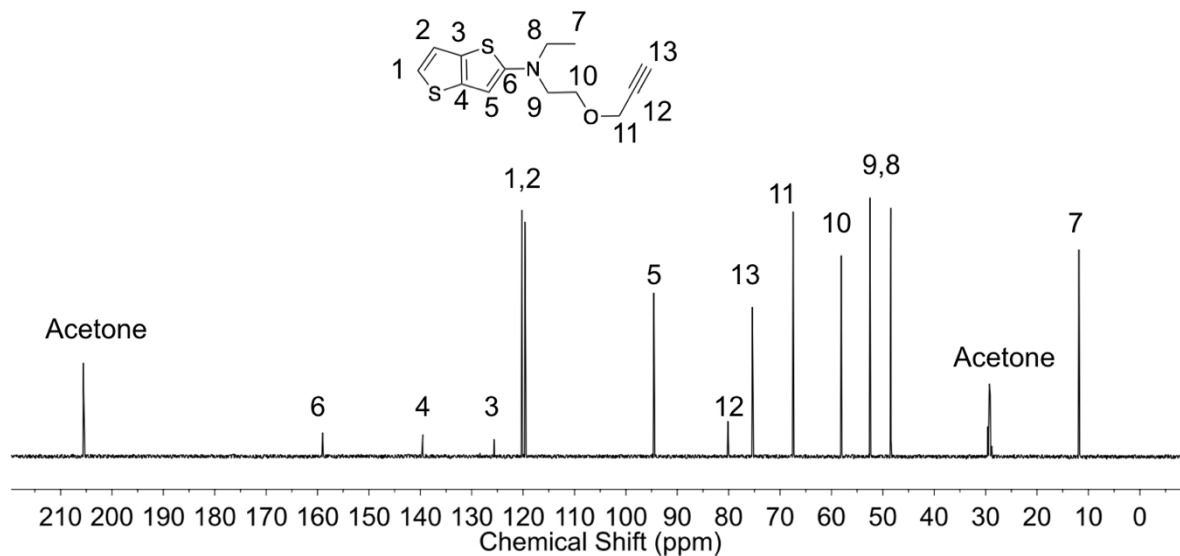

$^{13}\text{C}$  NMR (126 MHz, Acetone- $d_6$ ) of **8**.

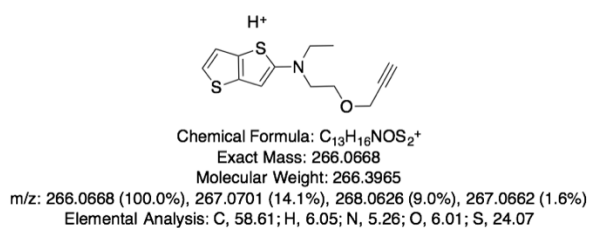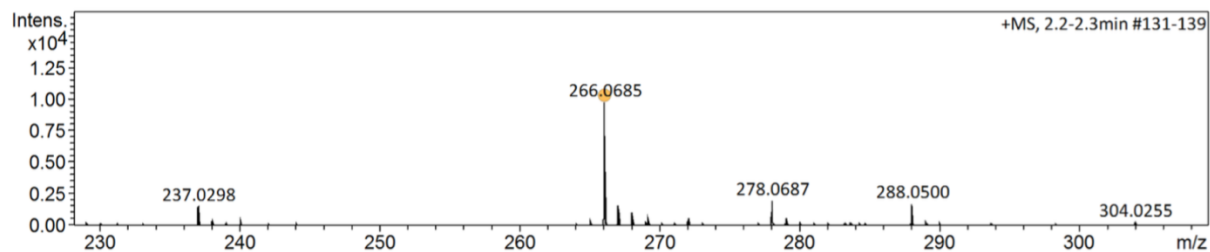

HRMS of **8**.

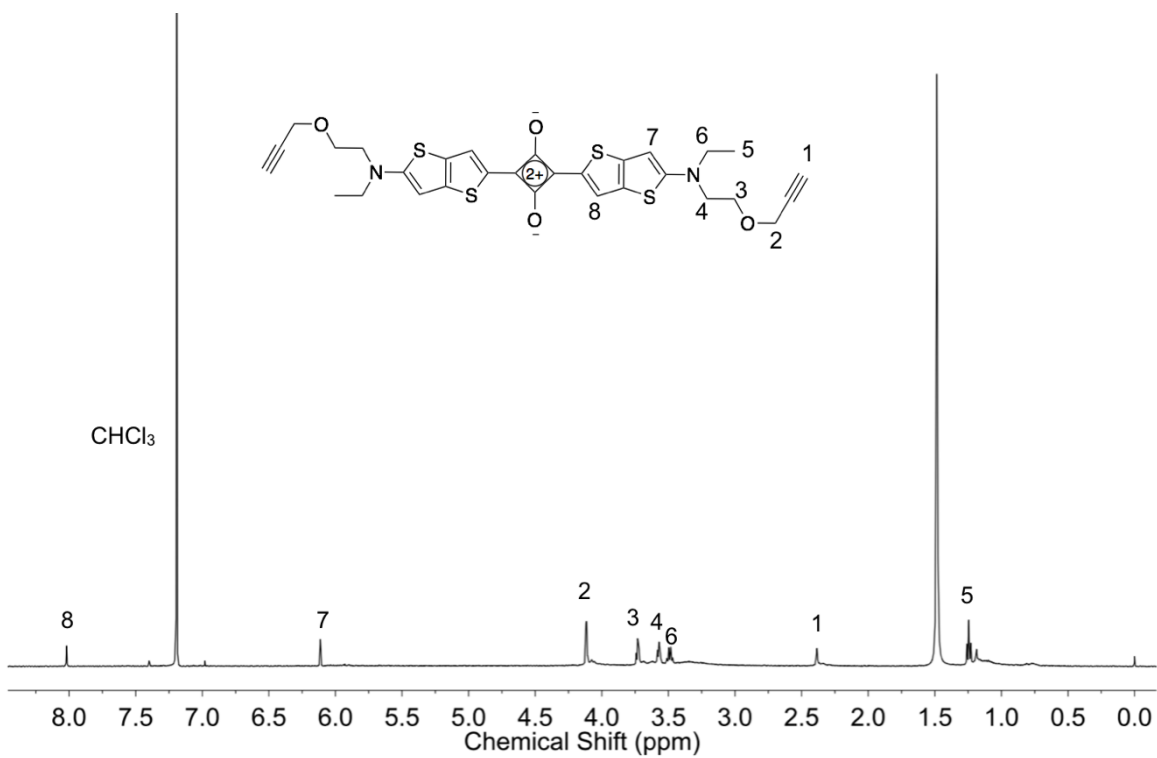

$^1\text{H}$  NMR (500 MHz,  $\text{CDCl}_3$ ) of **S3**.

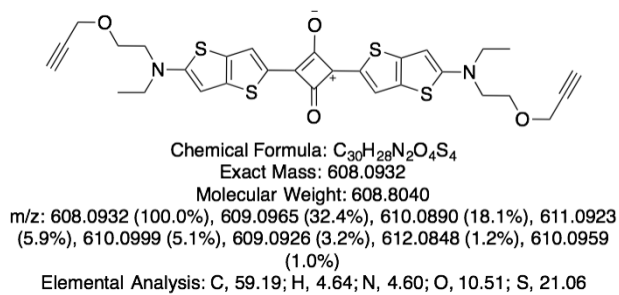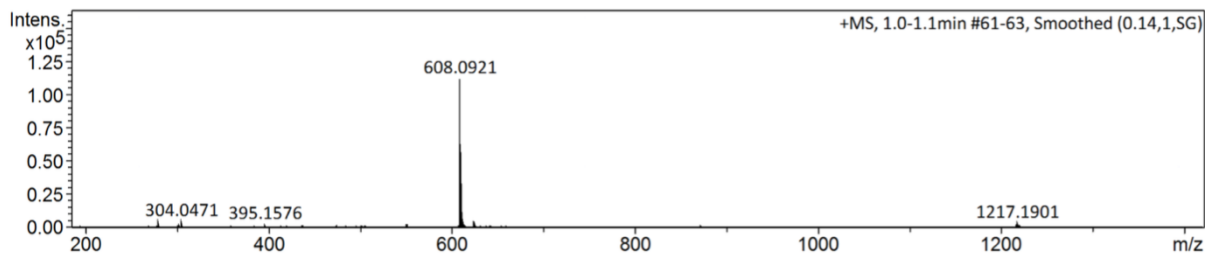

HRMS-ESI of **S3**.

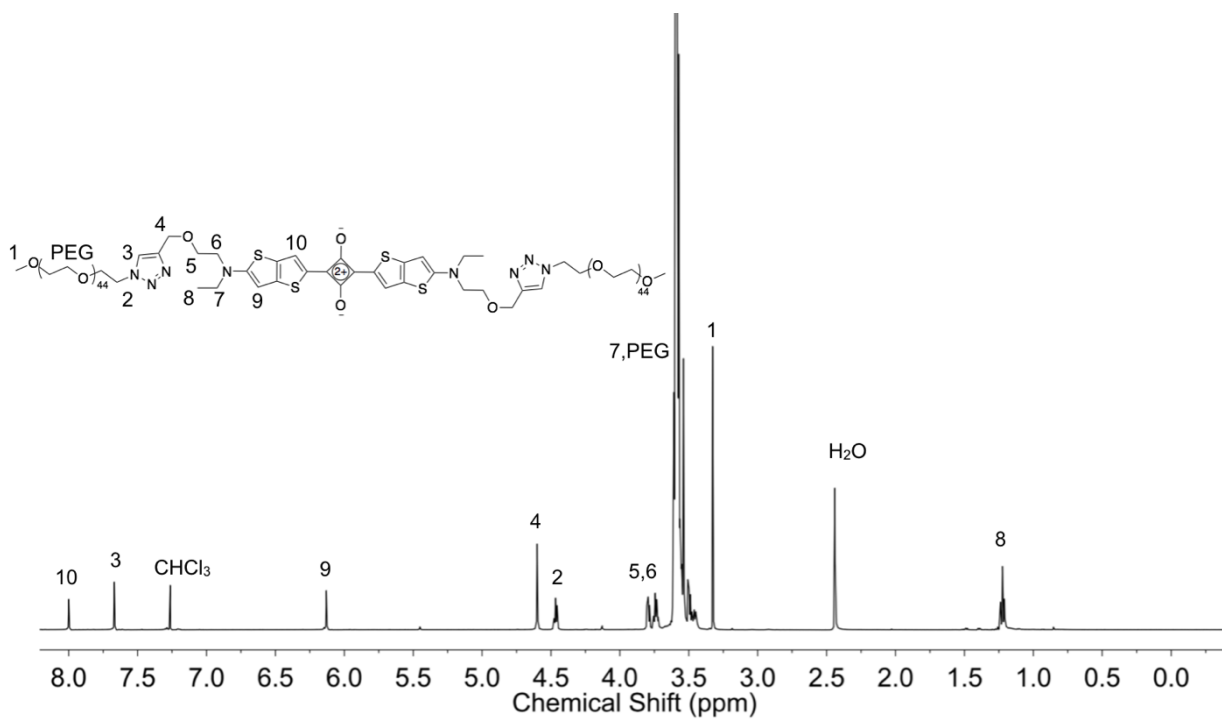

<sup>1</sup>H NMR (500 MHz, CDCl<sub>3</sub>) of **S3PEG**.

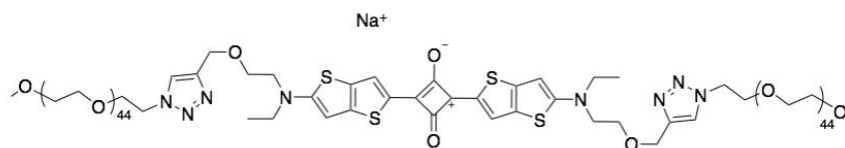

Chemical Formula:  $C_{212}H_{394}N_8NaO_{94}S_4^+$

Exact Mass: 4707.5071

Molecular Weight: 4710.6752

m/z: 4709.5138 (100.0%), 4708.5105 (87.6%), 4710.5172 (75.7%), 4707.5071 (38.2%), 4711.5206 (28.4%), 4711.5181 (19.3%), 4712.5239 (18.1%), 4711.5096 (18.1%), 4710.5147 (16.9%), 4710.5063 (15.8%), 4711.5206 (14.0%), 4712.5130 (13.7%), 4712.5214 (12.2%), 4709.5114 (7.4%), 4709.5029 (6.9%), 4713.5248 (5.5%), 4713.5163 (5.1%), 4713.5139 (3.5%), 4714.5197 (3.3%), 4710.5132 (3.2%), 4713.5273 (3.2%), 4712.5105 (3.1%), 4710.5109 (3.0%), 4709.5099 (2.8%), 4709.5075 (2.6%), 4713.5163 (2.5%), 4711.5166 (2.4%), 4711.5142 (2.2%), 4714.5172 (2.2%), 4713.5273 (1.7%), 4711.5072 (1.3%), 4713.5054 (1.2%), 4708.5065 (1.2%), 4708.5042 (1.1%), 4712.5021 (1.1%)

Elemental Analysis: C, 54.05; H, 8.43; N, 2.38; Na, 0.49; O, 31.93; S, 2.72

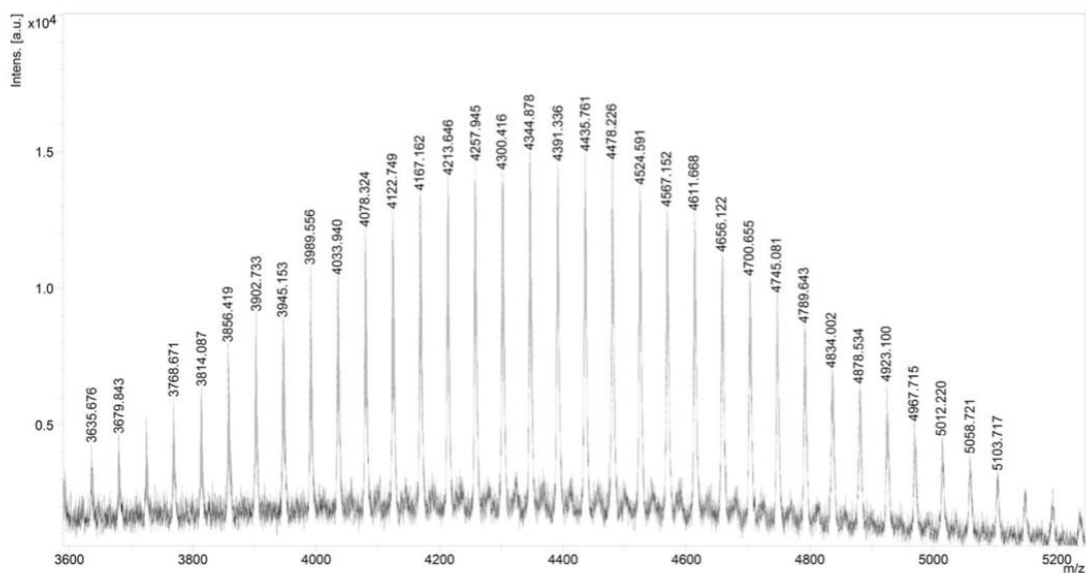

MS-MALDI (DHBA as matrix) of **S3PEG**. A set of peaks around 4391 reflect the polydispersity of the PEG<sub>45</sub> chains.



## B. Titration Data

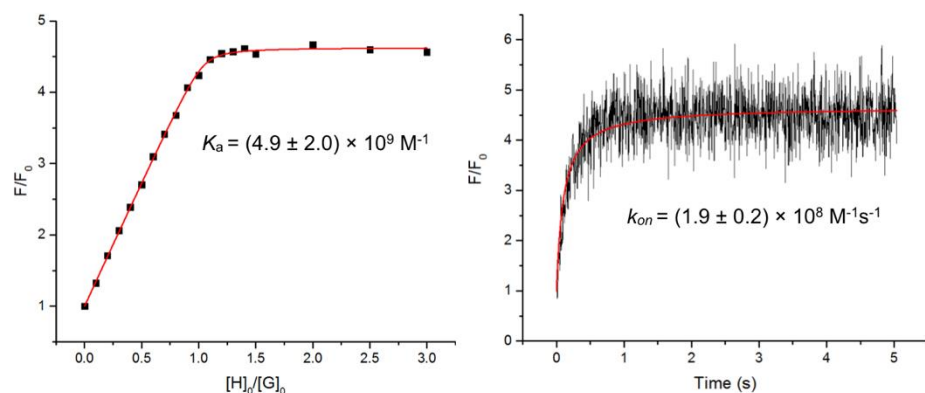

Figure S1. (*left*) Fluorescence (ex: 630 nm, em: 700 nm, slit 3 nm) titration isotherm for incremental addition of **M2** to a solution of **S1PEG** (250 nM) in water. (*right*) Threading kinetic profile generated by mixing equal molar concentration (50 nM each) of **S1PEG** and **M2** in a stopped flow device (ex: 630 nm, em: 700 nm, slit 3 nm). The red lines are computer fits of experimental data to 1:1 binding model or second order kinetic model, respectively.

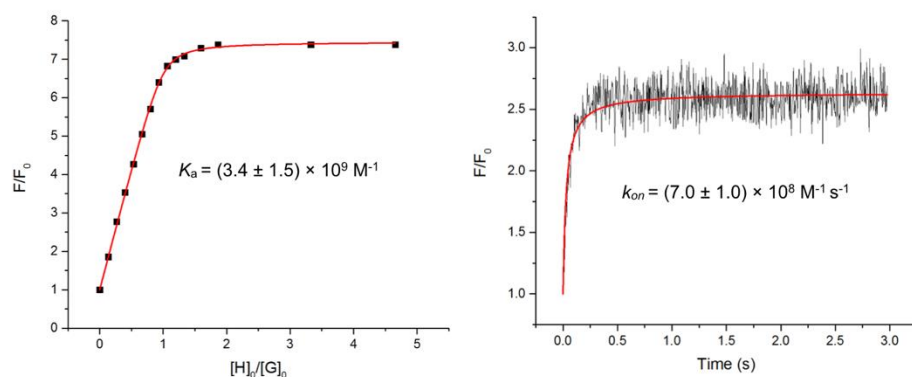

Figure S2. (*left*) Fluorescence (ex: 723 nm, em: 753 nm, slit 5 nm) titration isotherm for incremental addition of **M2** to a solution of **S2PEG** (250 nM) in water. (*right*) Threading kinetic profile generated by mixing equal molar concentration (50 nM each) of **S2PEG** and **M2** in a stopped flow device (ex: 723 nm, em: 753 nm, slit 3 nm). The red lines are computer fits of experimental data to 1:1 binding model or second order kinetic model, respectively.

### C. Photostability Data

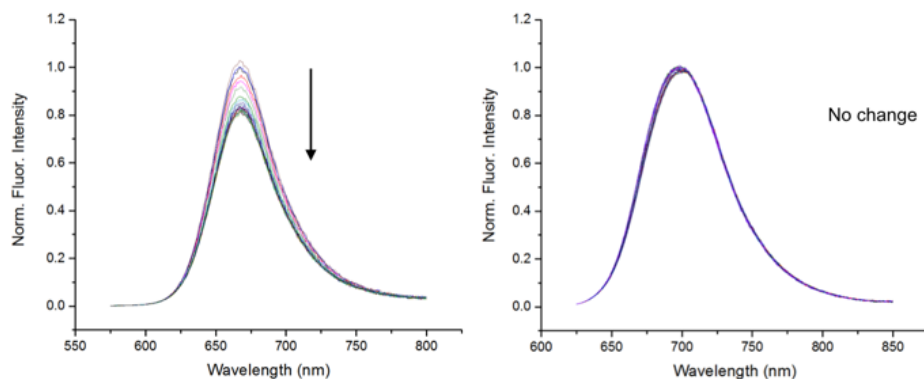

Figure S3. Photostability of free **S1PEG** (5 μM, *left*) and **M2 S1PEG** (5 μM, *right*) in H<sub>2</sub>O with continuous irradiation at 550 nm over 15 h (fluorescence spectrum was collected every 30 min).

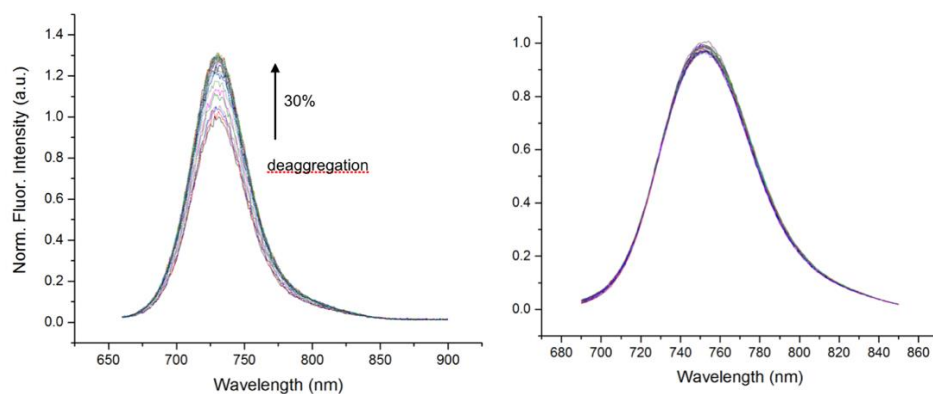

Figure S4. Photostability test of free **S2PEG** (2 μM, *left*) and **M2 S3PEG** (2 μM, *right*) in H<sub>2</sub>O with continuous irradiation at 650 nm over 15 h (fluorescence spectrum was collected every 30 min). Note: slight increase in fluorescence over time for free **S2PEG** is attributed to slow deaggregation.

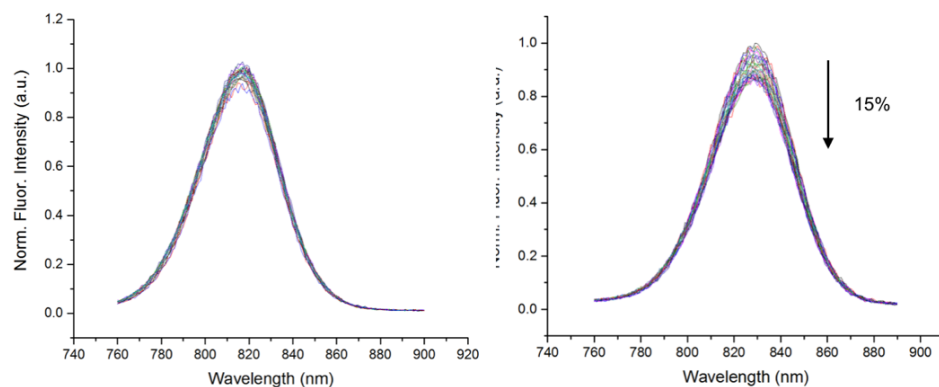

Figure S5. Photo stability test of the **S3PEG** (2 μM, *left*) and **M2 S3PEG** (2 μM, *right*) in H<sub>2</sub>O with continuous irradiation at 750 nm over 15 h (fluorescence spectrum was collected every 30 min).

## D. Chemical Stability Data

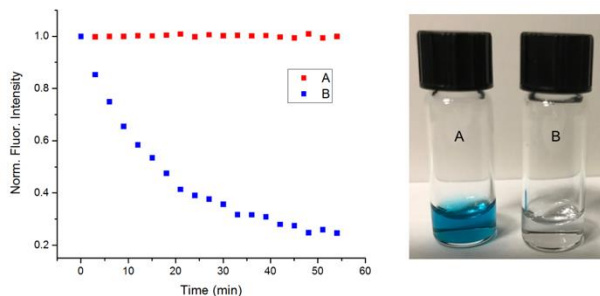

Figure S6. Chemical stability test of **S1PEG** and **M2**  $\supset$  **S1PEG**. (left) Change in fluorescent maxima band for solutions of (A) **M2**  $\supset$  **S1PEG** (5.0  $\mu$ M) or (B) free **S1PEG** (5  $\mu$ M), in the presence of excess nucleophile  $\text{Na}_2\text{S}$  (5 mM) in water at 20°C. (right) Photograph of samples containing, (A) **M2**  $\supset$  **S1PEG** (80  $\mu$ M) or (B) free **S1PEG** (80  $\mu$ M), after sitting in the presence of excess nucleophile  $\text{Na}_2\text{S}$  (100 mM) in water at 20 °C.

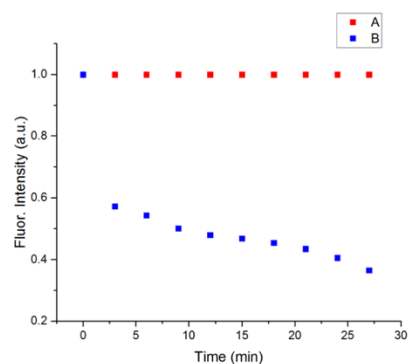

Figure S7. Chemical stability test of **S2PEG** and **M2**  $\supset$  **S2PEG** by monitoring the change in fluorescent maxima band for solutions of (A) **M2**  $\supset$  **S2PEG** (5.0  $\mu$ M) or (B) free **S2PEG** (5  $\mu$ M) over time in the presence of excess nucleophile  $\text{Na}_2\text{S}$  (5 mM) in water at 20 °C.

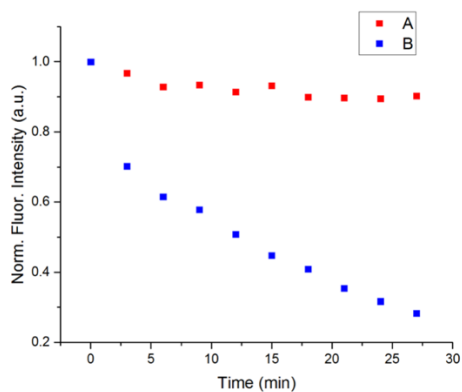

Figure S8. Chemical stability test of **S3PEG** and **M2**  $\supset$  **S3PEG** by monitoring change in fluorescent maxima band for solutions of (A) **M2**  $\supset$  **S3PEG** (1.0  $\mu$ M) or (B) free **S3PEG** (1  $\mu$ M), in the presence of excess nucleophile  $\text{Na}_2\text{S}$  (1 mM) in water at 20 °C.

## E. Fluorescence Quantum Yields

Table S1. Integrated fluorescent and quantum yield of **ICG**, **S3PEG**, and **M2**  $\supset$  **S3PEG** in H<sub>2</sub>O.

|                         | <b>ICG</b>                   | <b>S3PEG</b>                 | <b>M2</b> $\supset$ <b>S3PEG</b> |
|-------------------------|------------------------------|------------------------------|----------------------------------|
| Integrated fluorescence | 2.2 $\times$ 10 <sup>6</sup> | 2.9 $\times$ 10 <sup>6</sup> | 4.4 $\times$ 10 <sup>6</sup>     |
| Quantum yield %         | 5.3                          | 7.0                          | 10.6                             |

Table S2. Photophysical properties of squaraines and their complexes with **M1** in CHCl<sub>3</sub>.

|                                                    | <b>S1</b> | <b>M1</b> $\supset$ <b>S1</b> | <b>S2</b> | <b>M1</b> $\supset$ <b>S2</b> | <b>S3</b> | <b>M1</b> $\supset$ <b>S3</b> |
|----------------------------------------------------|-----------|-------------------------------|-----------|-------------------------------|-----------|-------------------------------|
| Abs (nm)                                           | 627       | 650                           | 692       | 717                           | 767       | 783                           |
| Em (nm)                                            | 651       | 685                           | 715       | 749                           | 792       | 820                           |
| log $\epsilon$ (M <sup>-1</sup> cm <sup>-1</sup> ) | 5.39      | 4.68                          | 5.48      | 4.84                          | 5.59      | 5.02                          |
